# Supplementary material
Source: Springer Nature journal article supplement (https://www.springermedizin.de/resource/supplementary/12936_2008_676_MOESM1_ESM.pdf/9547984)

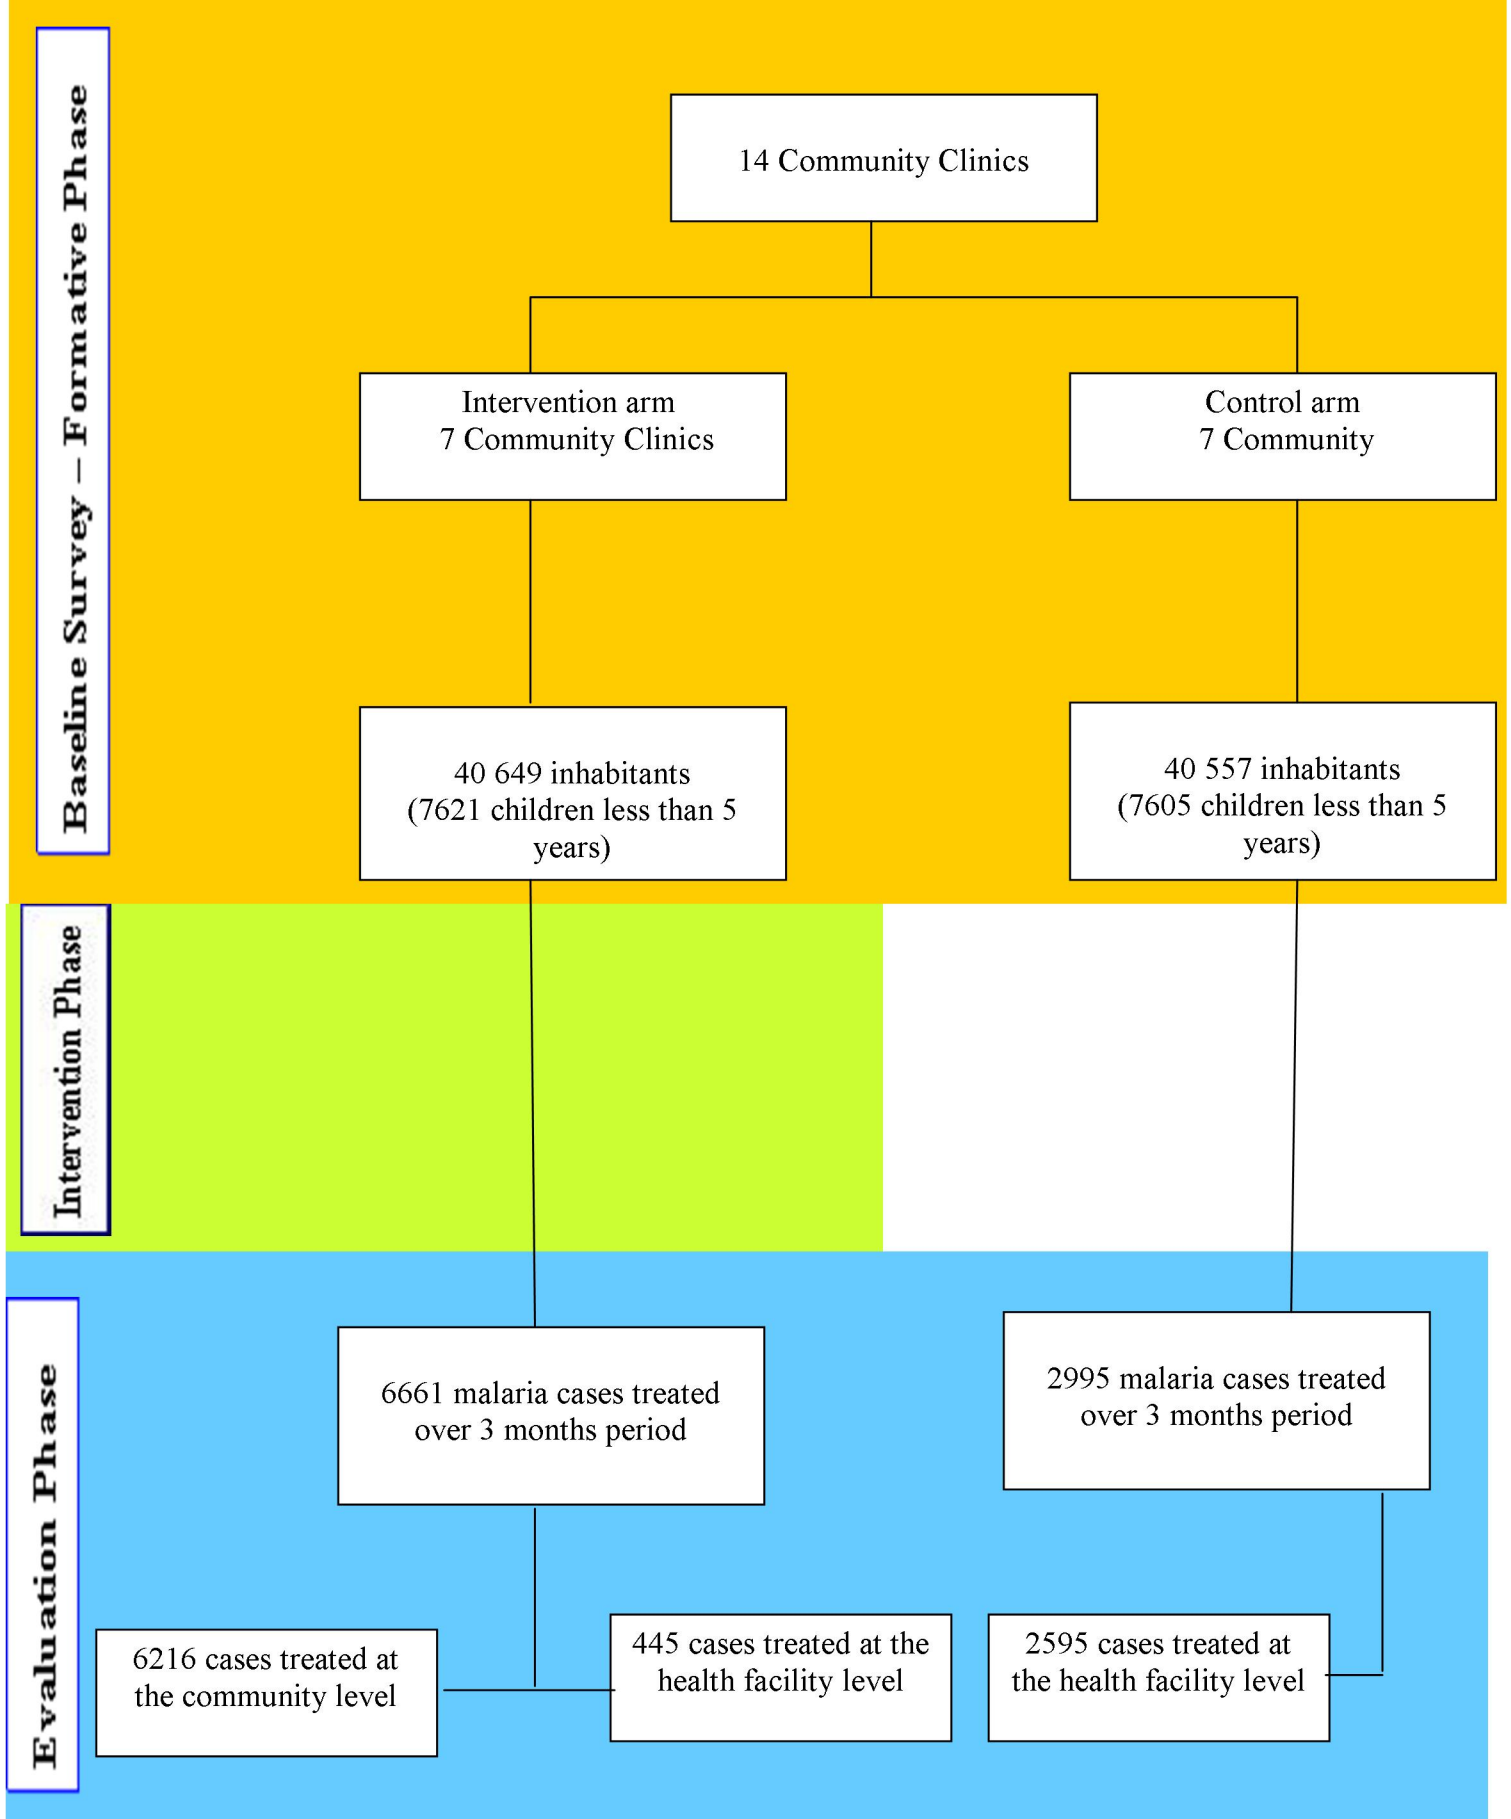

**Figure 1:** The trial profile

Supplement: MOESM1 [file 9547984]
